# Supplementary material for: Lipid hydroperoxides promote sarcopenia through carbonyl stress
Source: eLife journal article supplement (doi:10.7554/elife.85289), 2023-03-23

Figure 1E

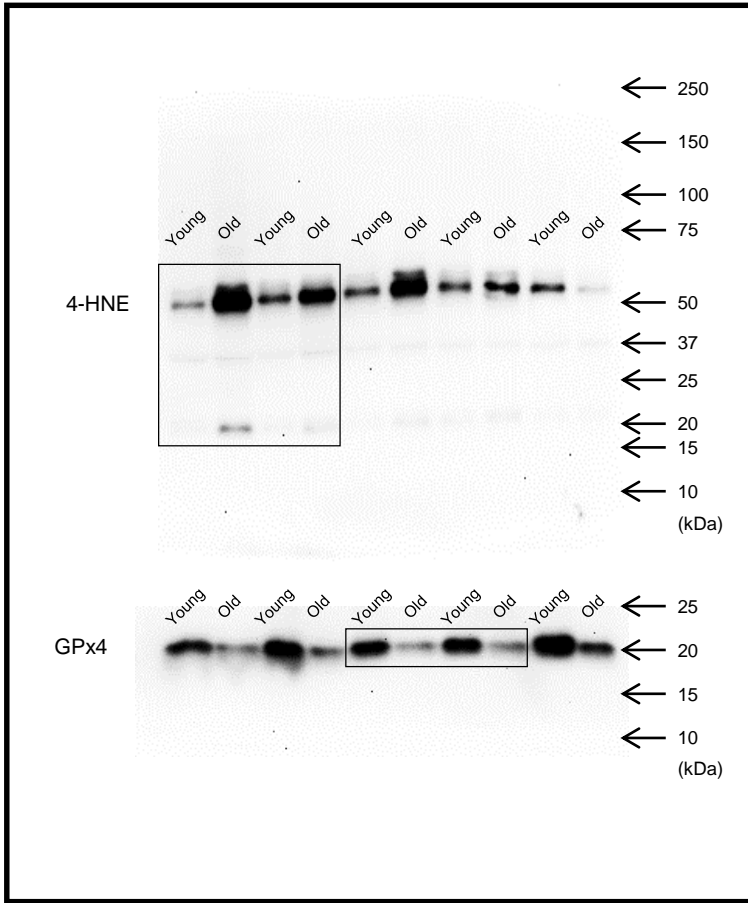

Figure 1-supplemental figure 1F

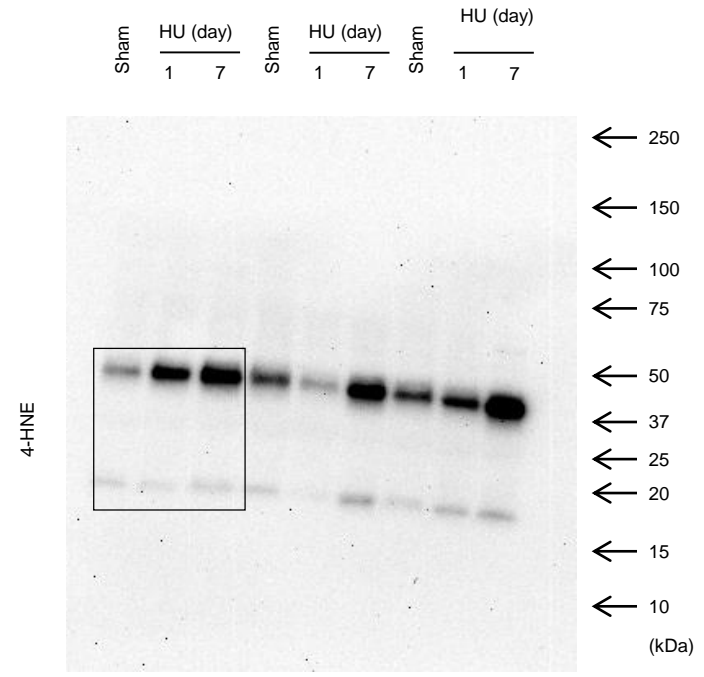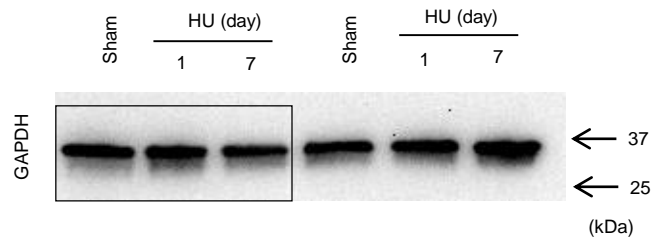

Figure 2E

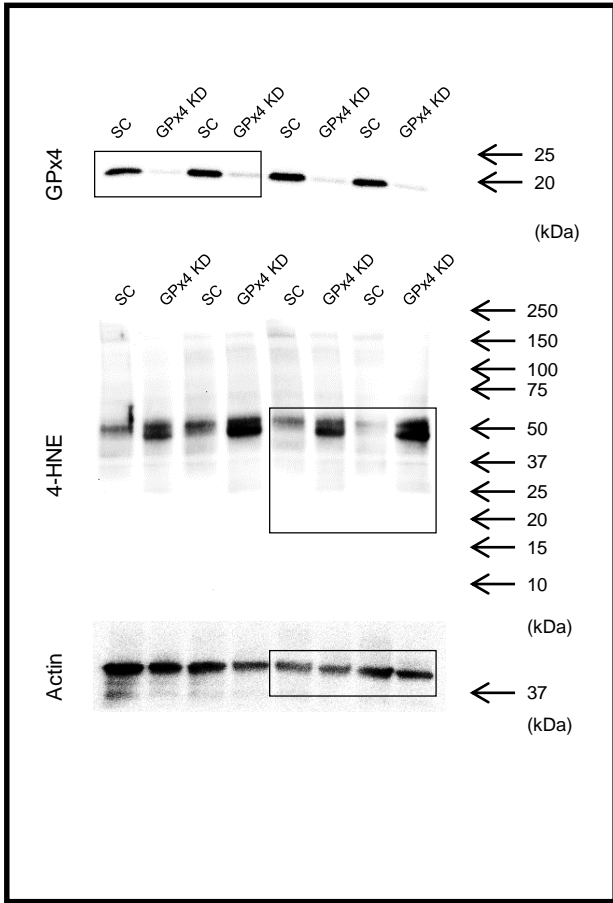

Figure 2-supplemental figure 1B

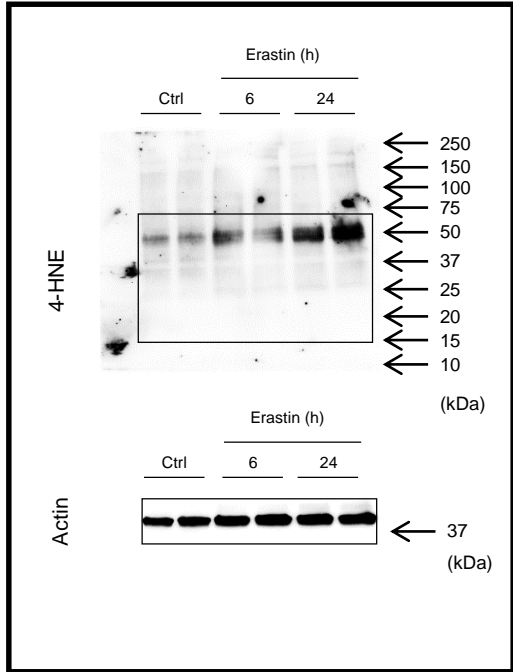

Figure 2-supplemental figure 1G

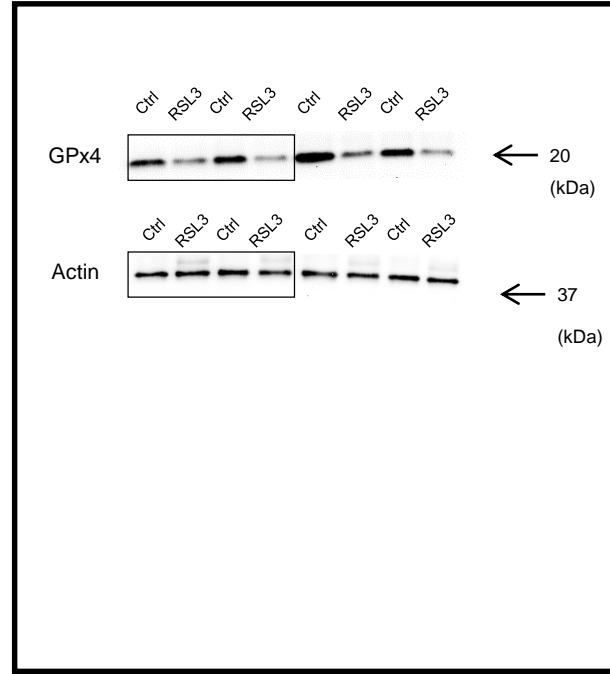

Figure 3B

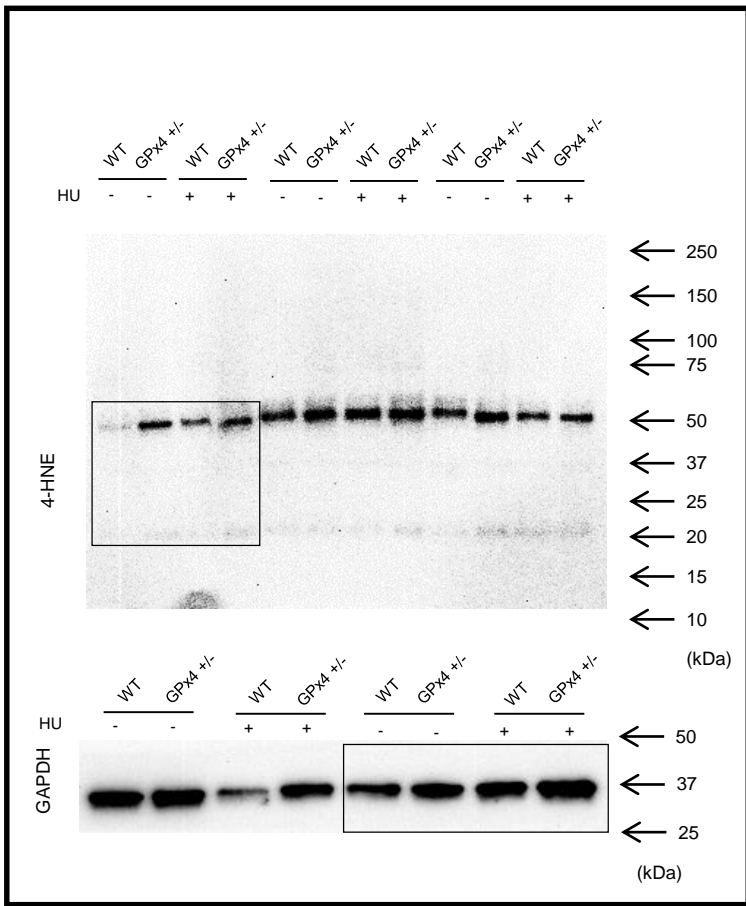

Figure 3G

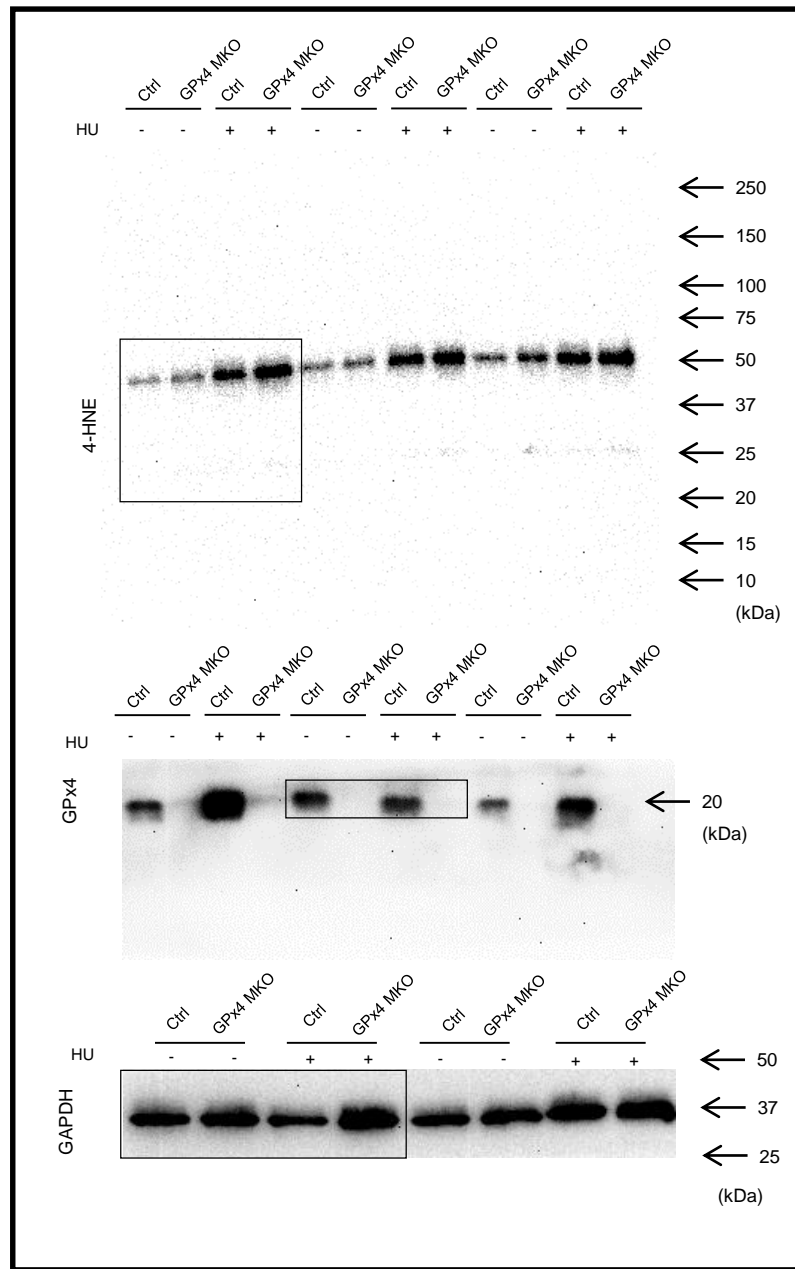

Figure 3-supplemental figure 2A

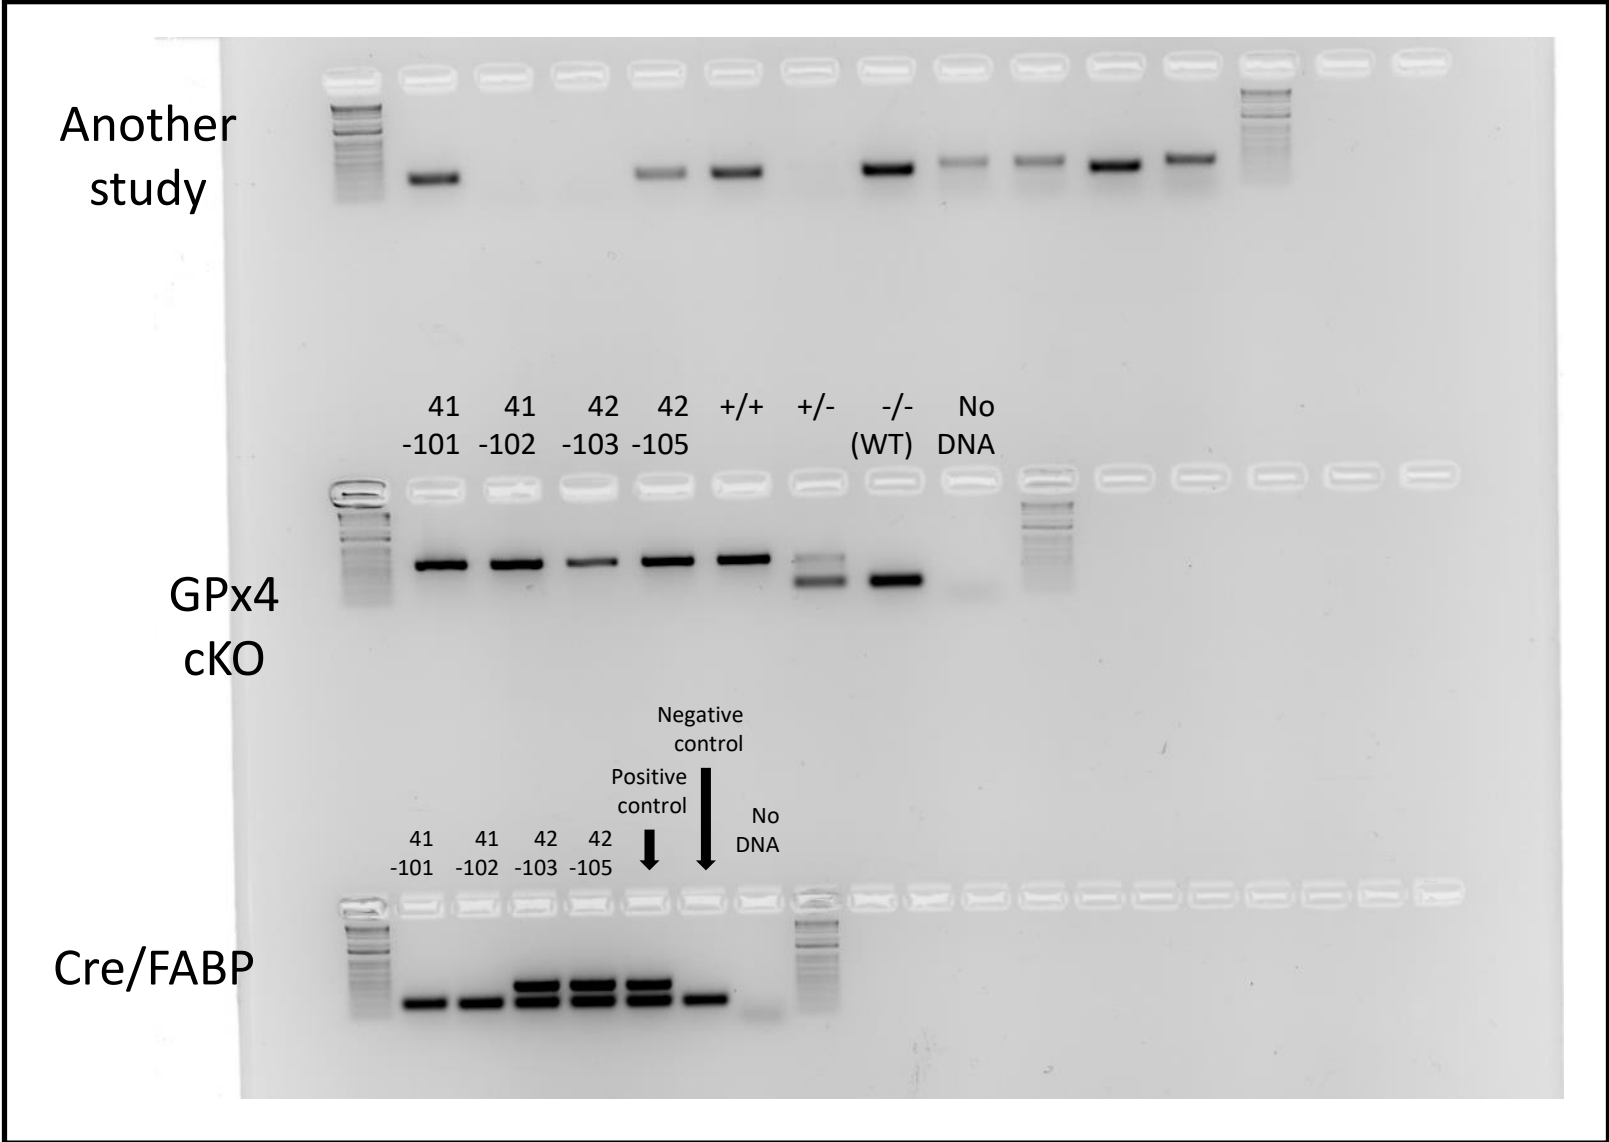

Figure 3-supplemental figure 2A

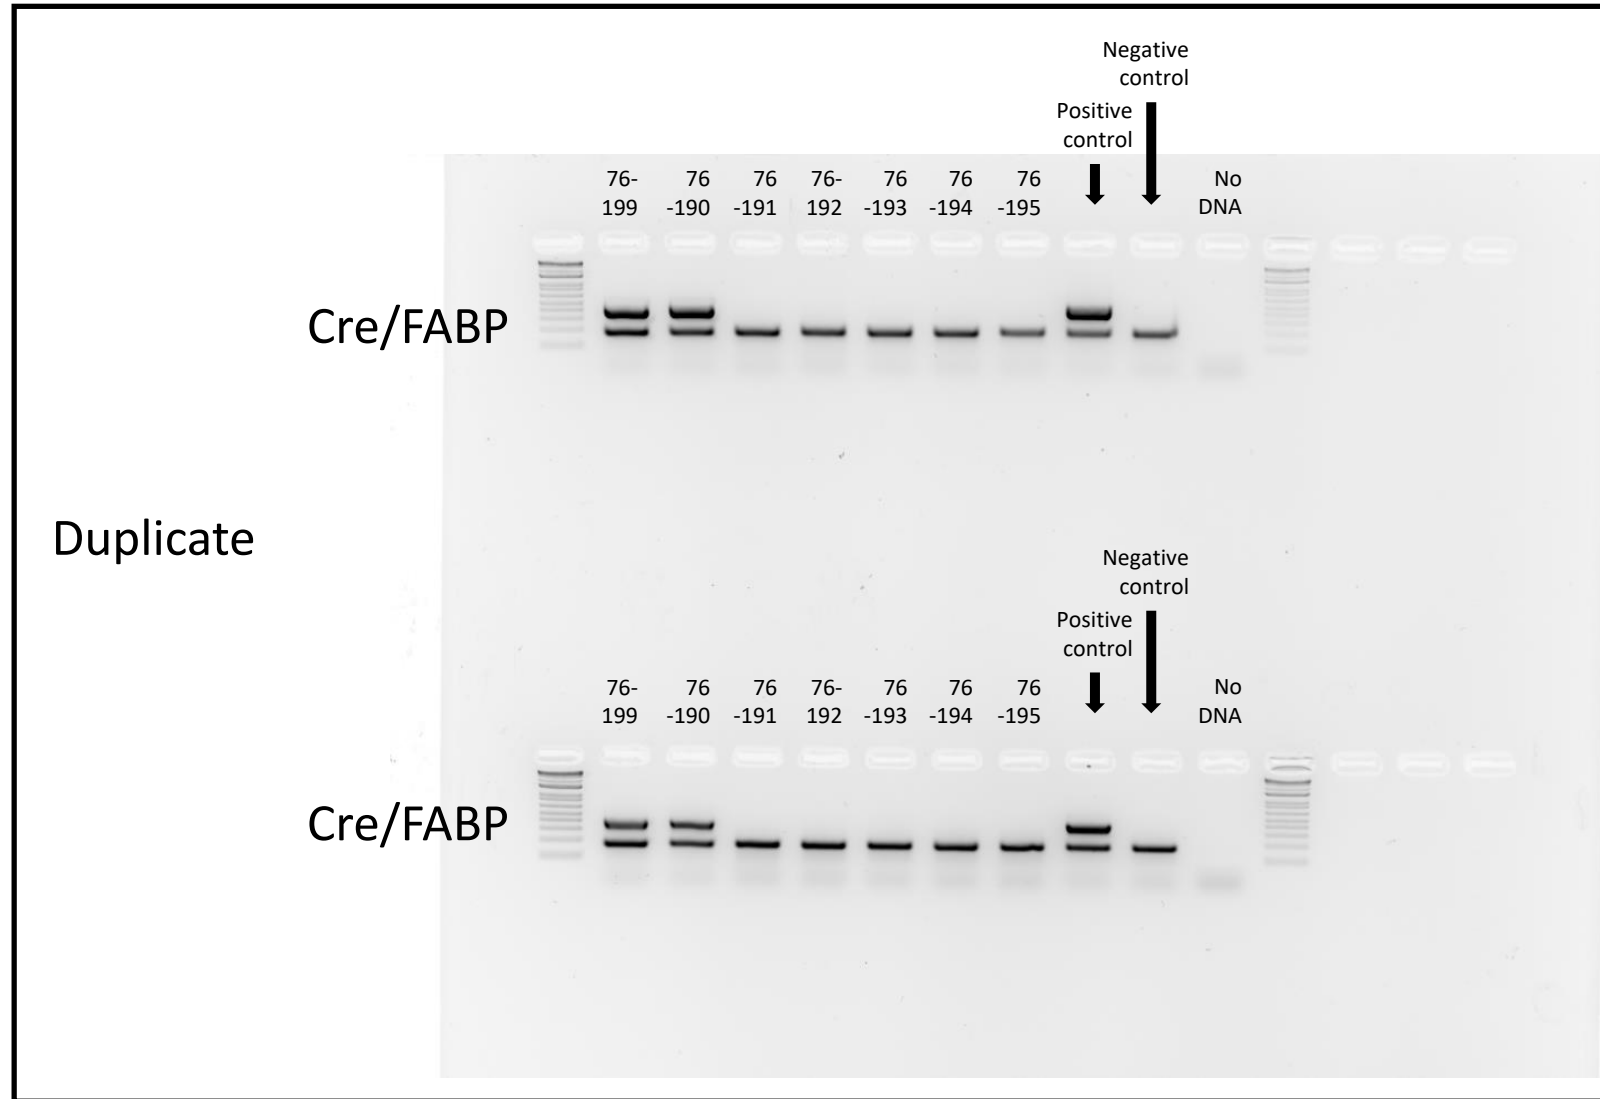

Figure 4B

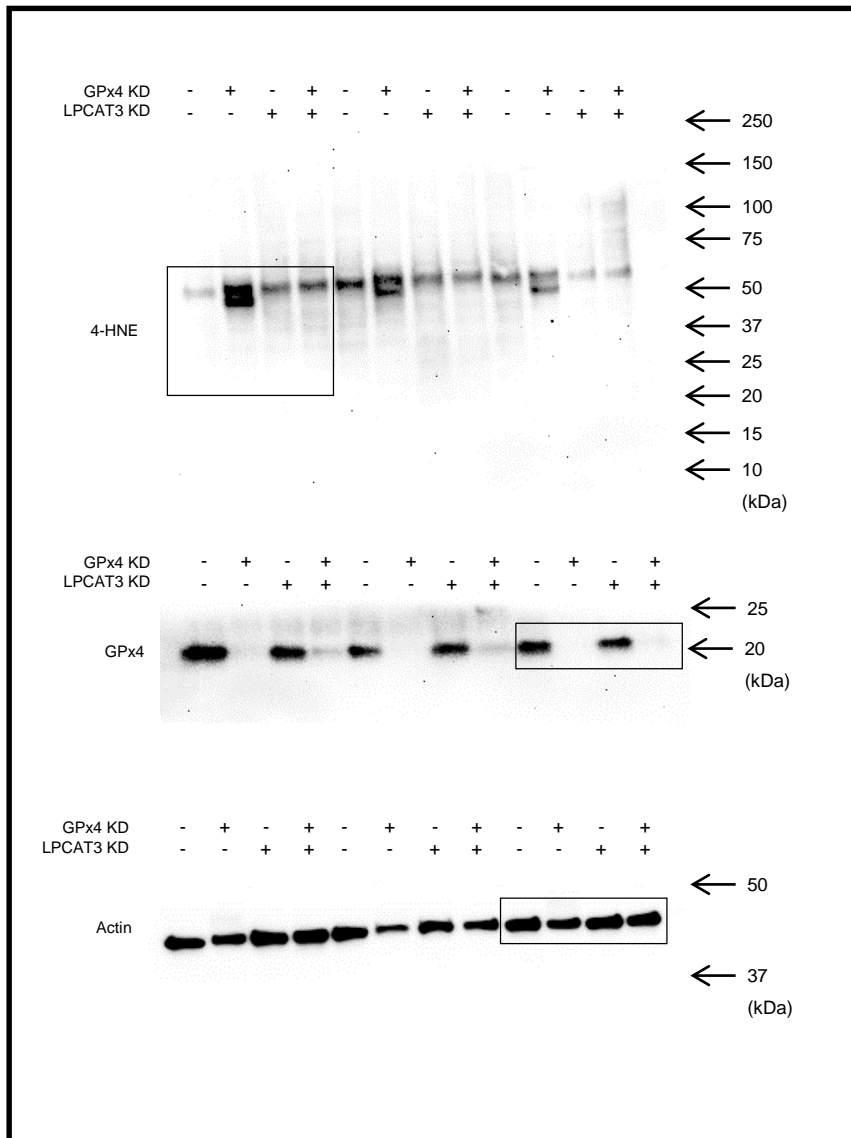

Figure 4F

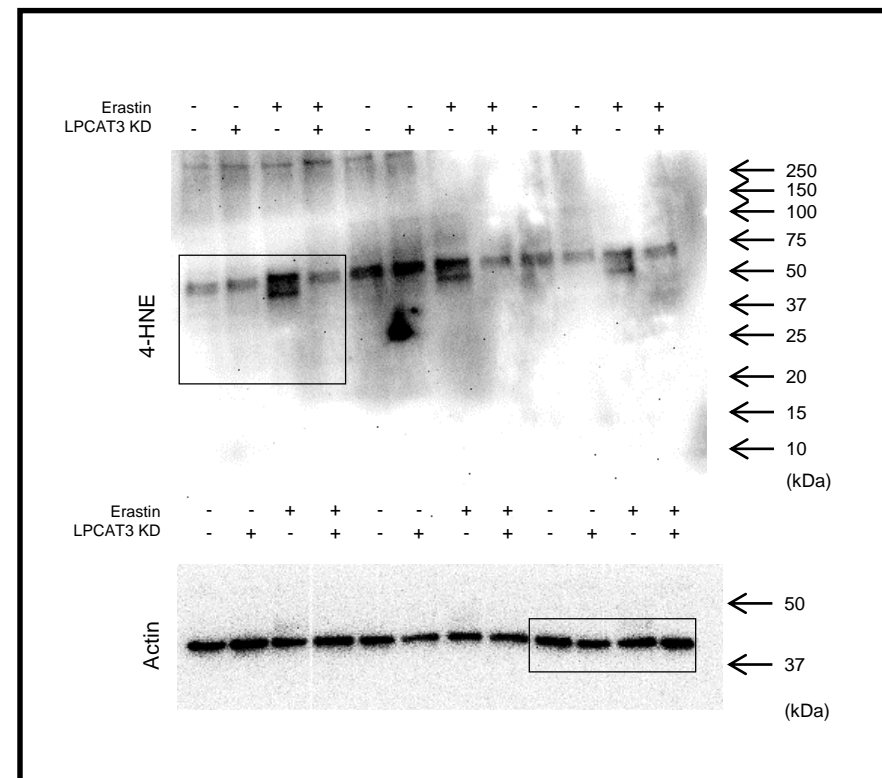



Figure 5c

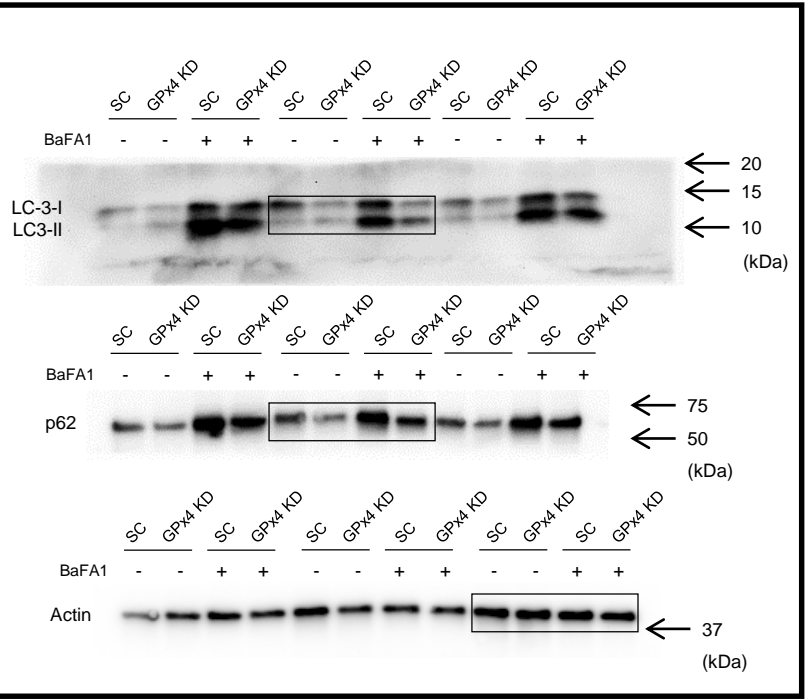

Figure 5-supplemental figure 1D

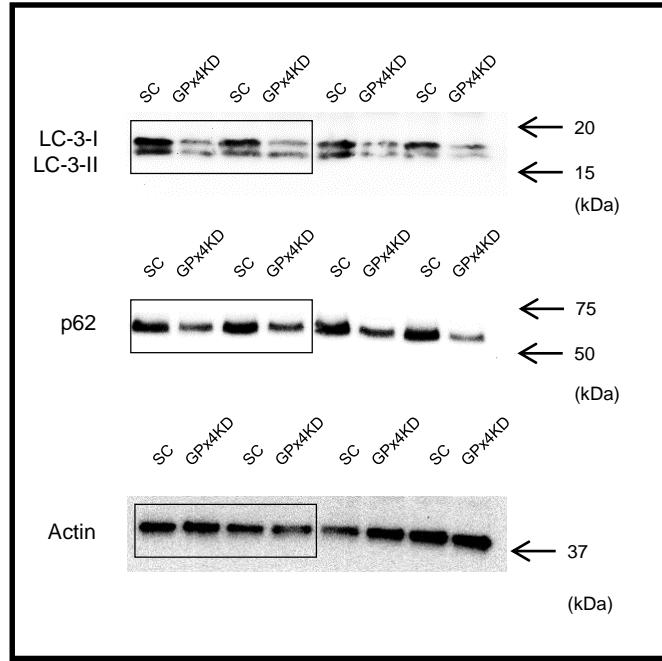

Figure 5-supplemental figure 1K

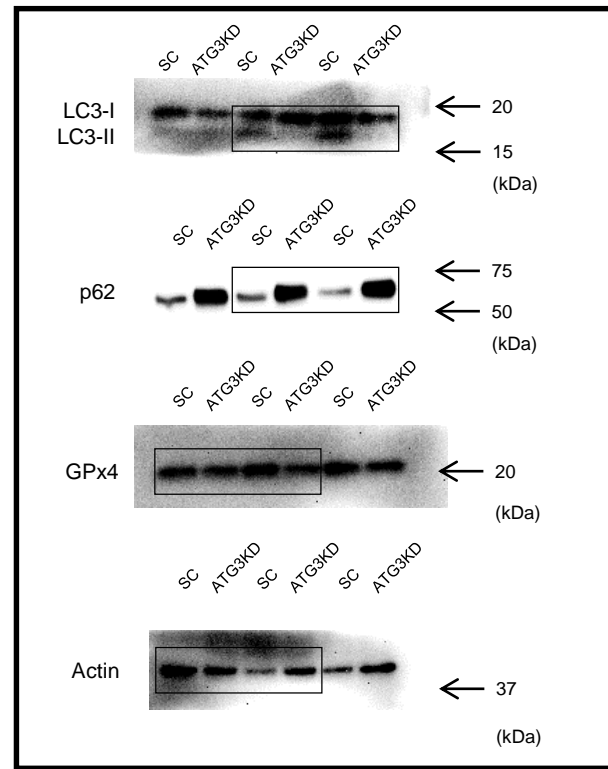

Figure 6B

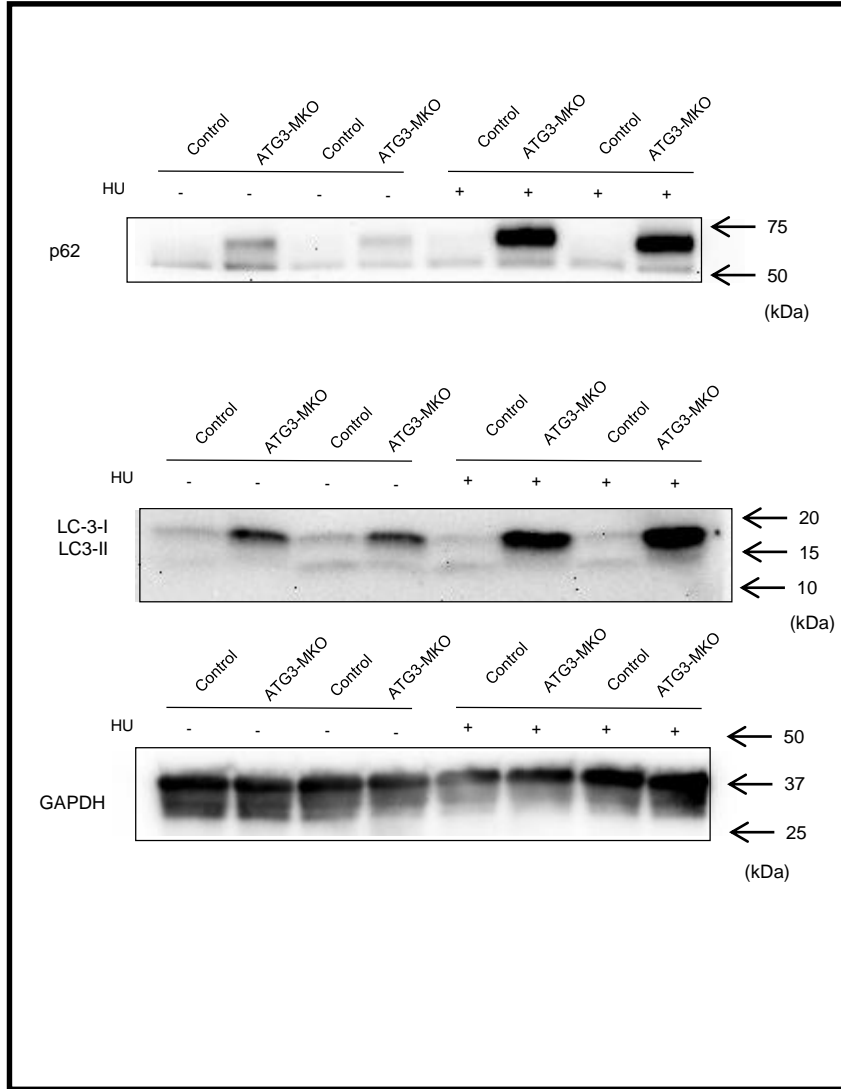

Figure 6B Continued

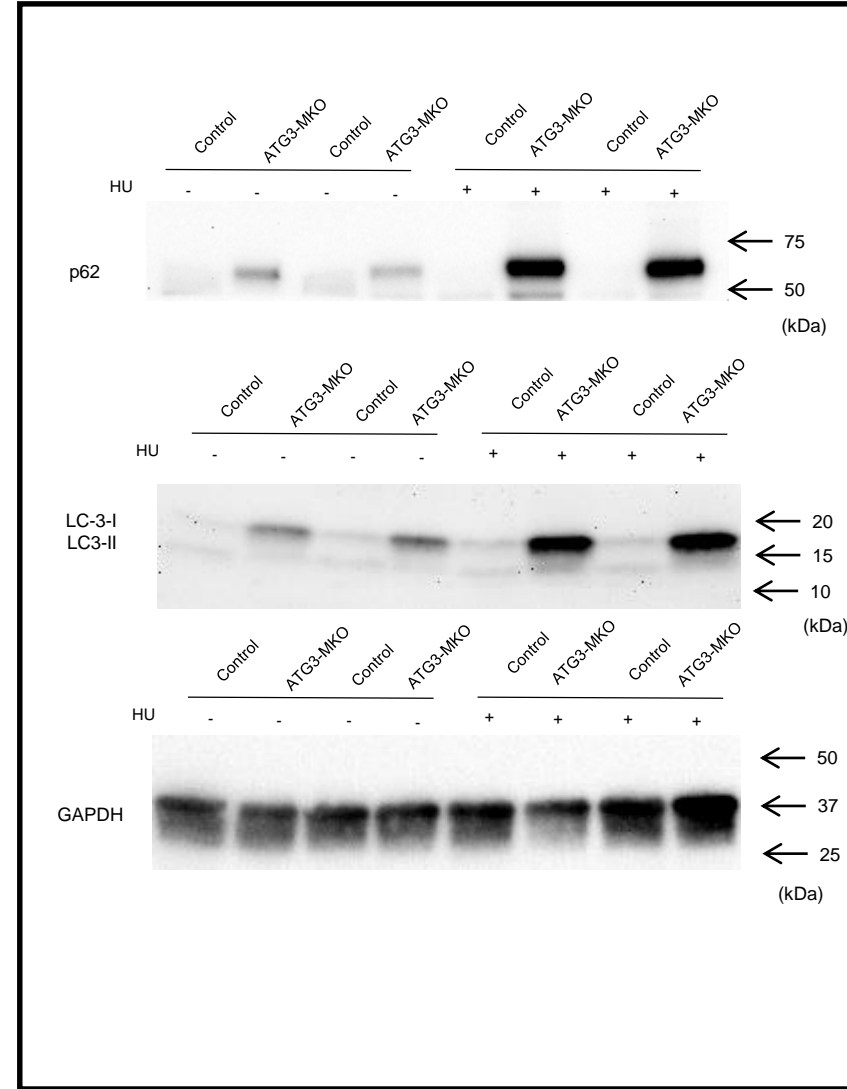

Figure 6B Continued

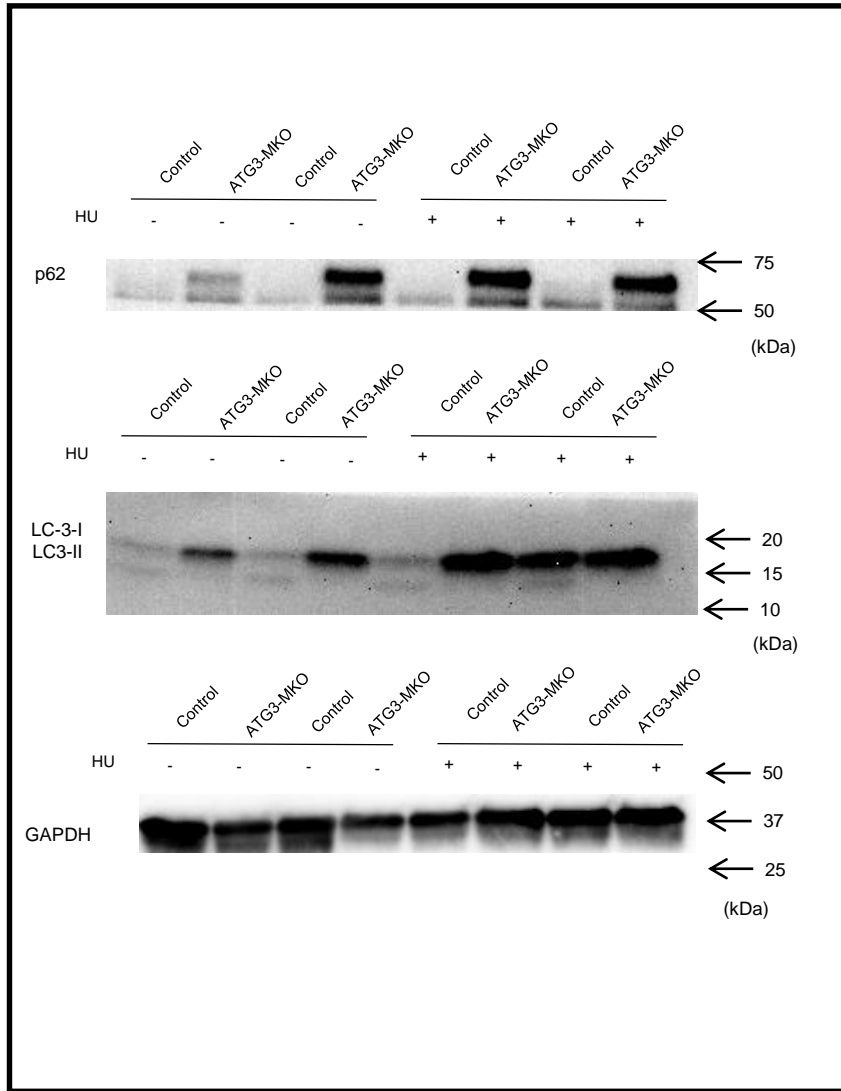

Figure 6B Continued

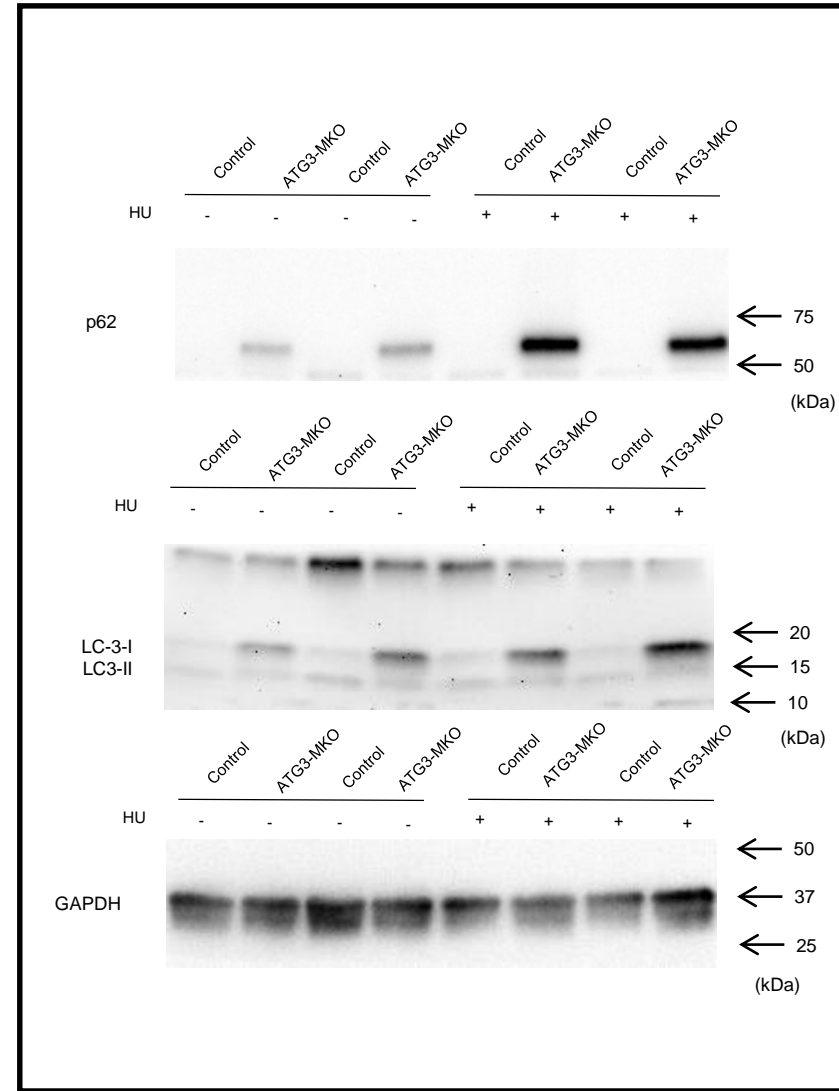

Figure 6-supplemental figure 1A

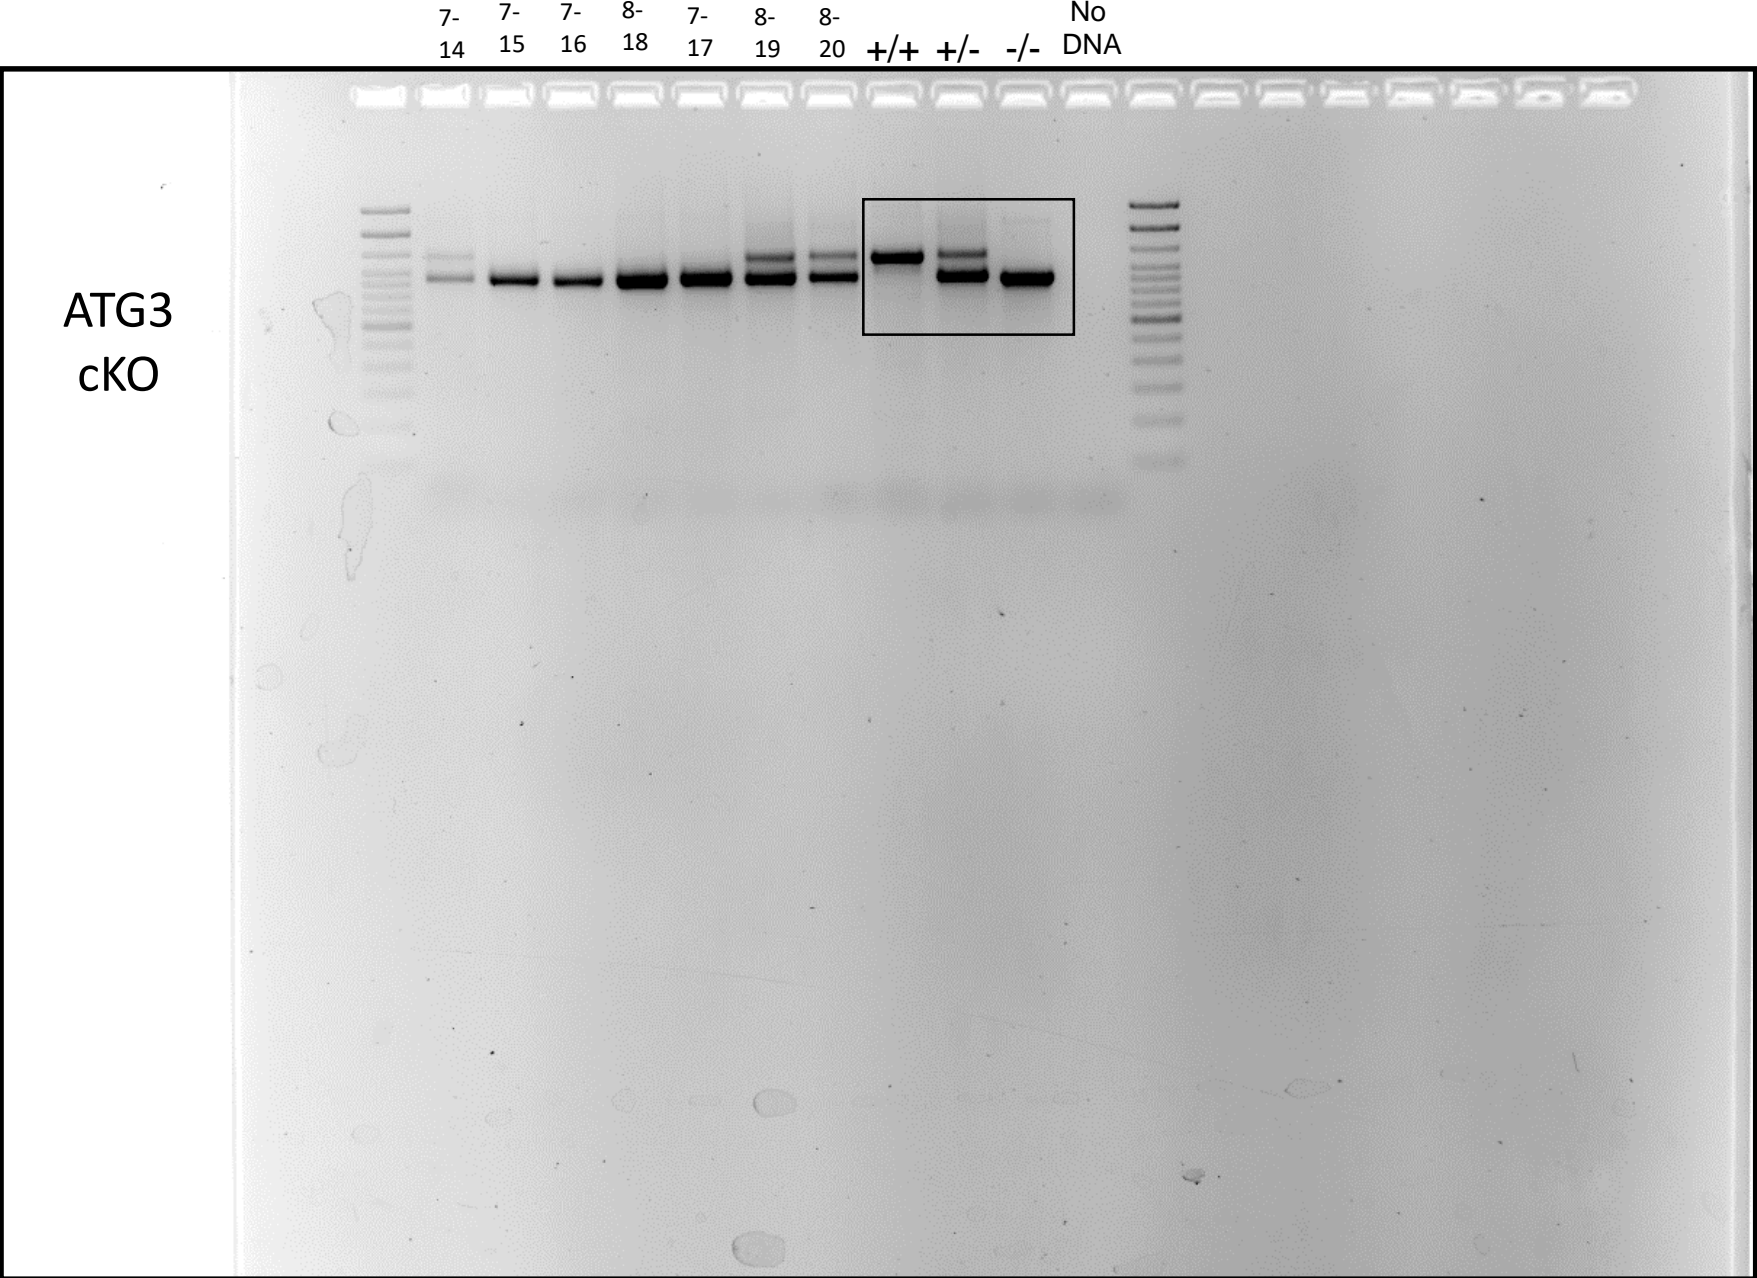

Figure 6-supplemental figure 1A Continued

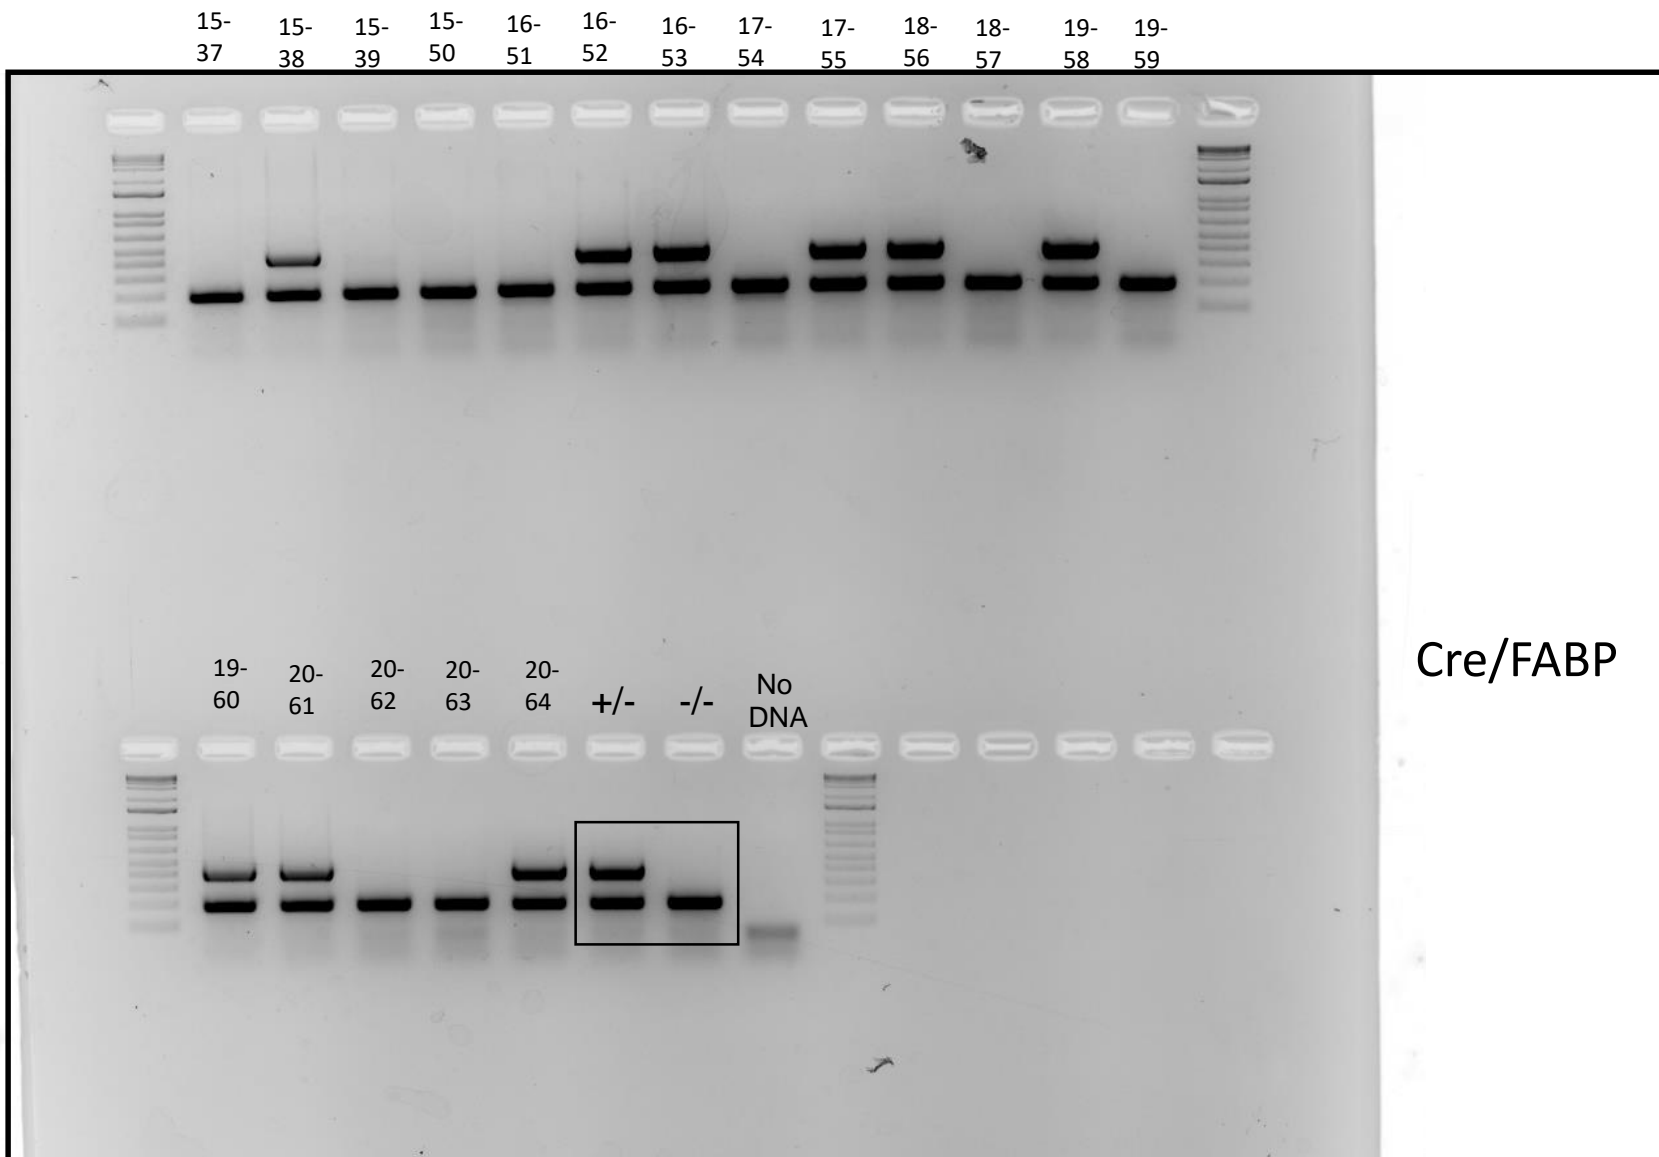

Figure 7A

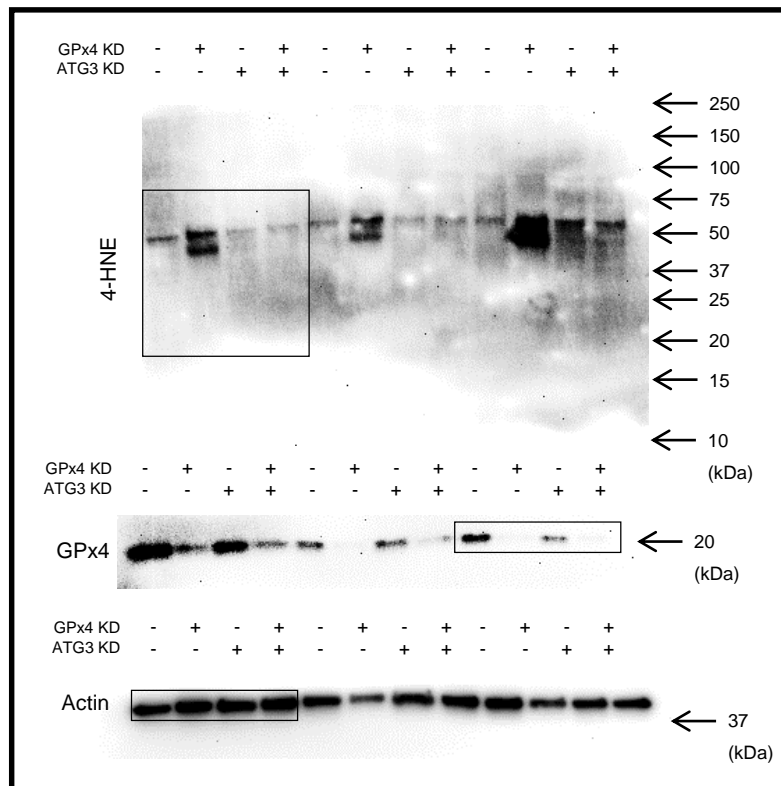

Figure 7C

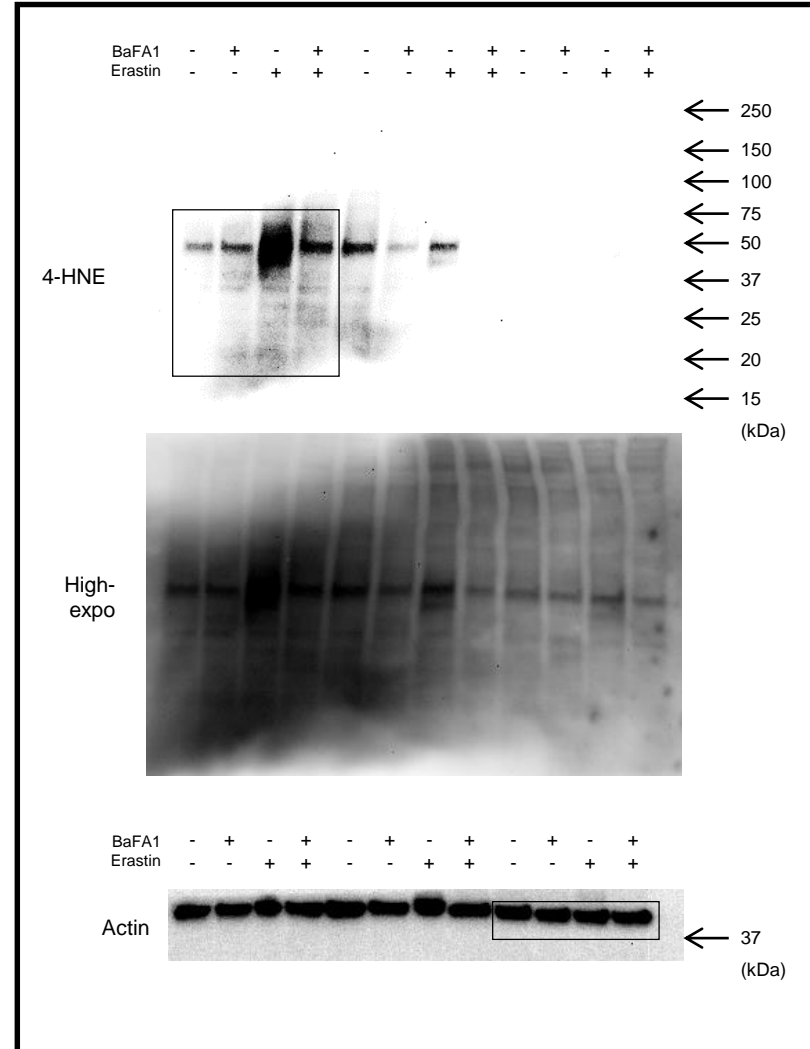

Figure 7G

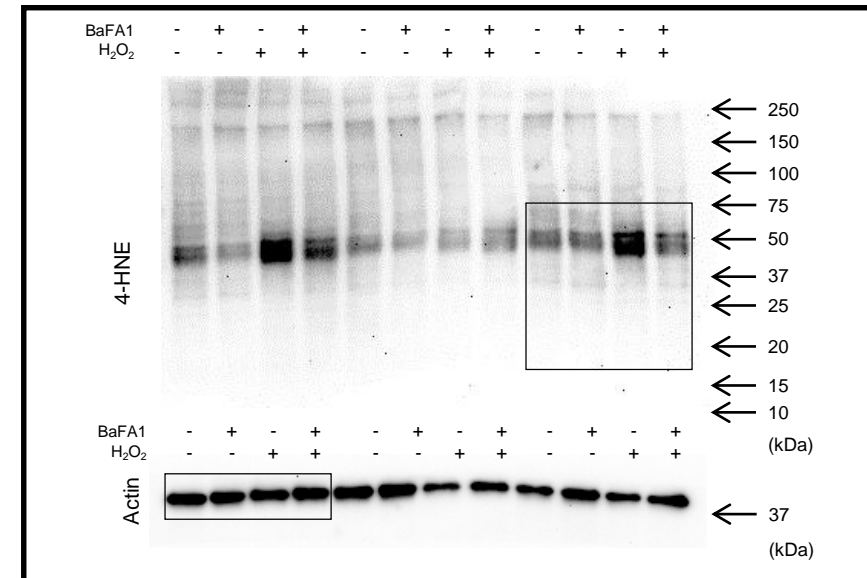

Figure 7-supplemental figure 1A

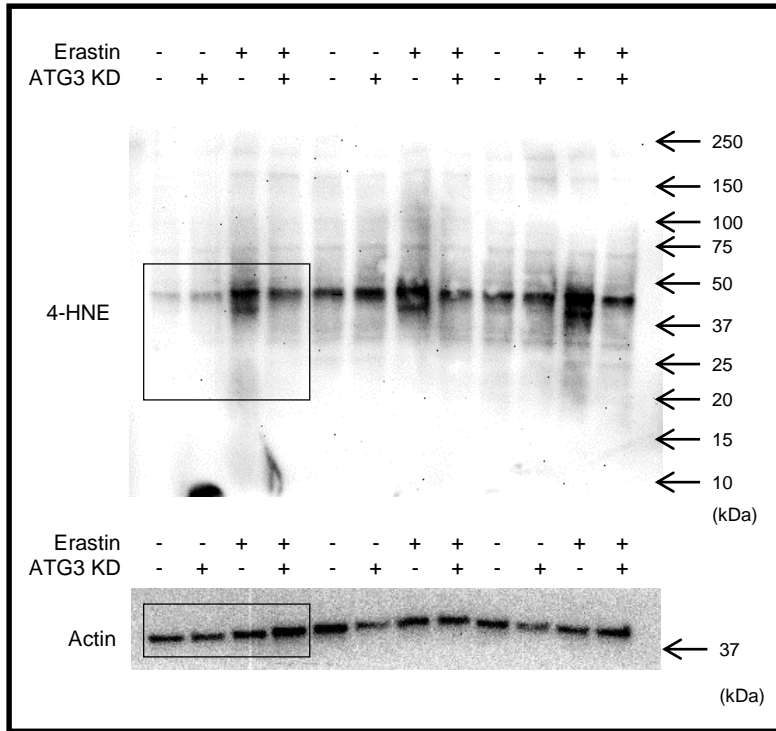

Figure 7-supplemental figure 1C

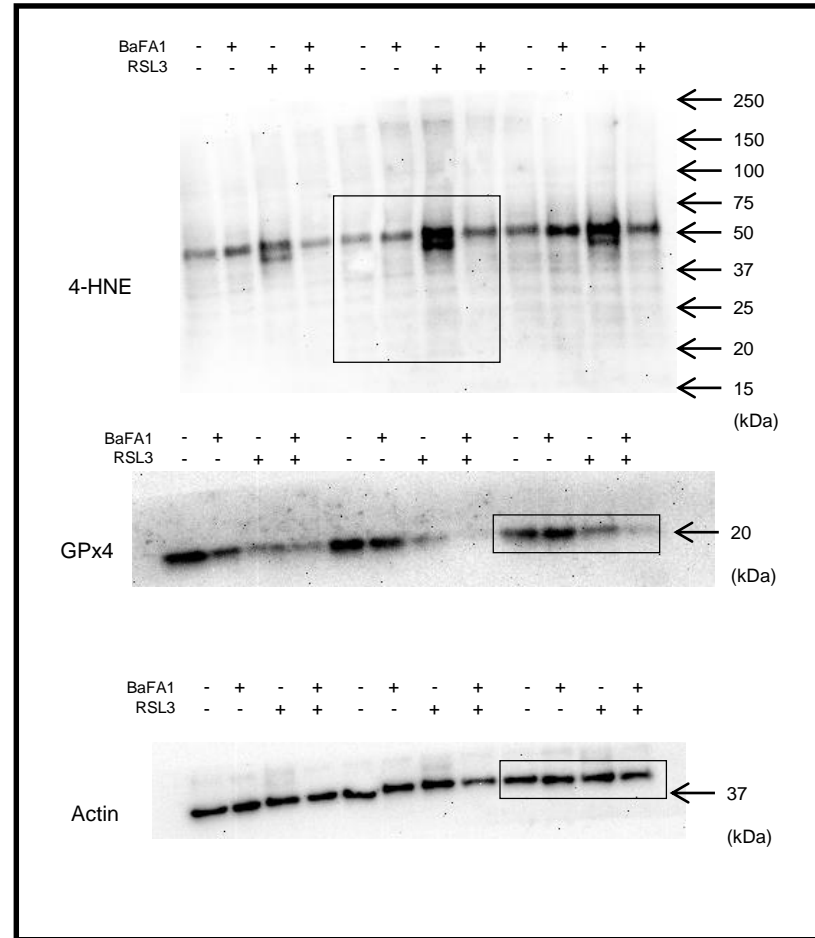

Figure 7-supplemental figure 1F

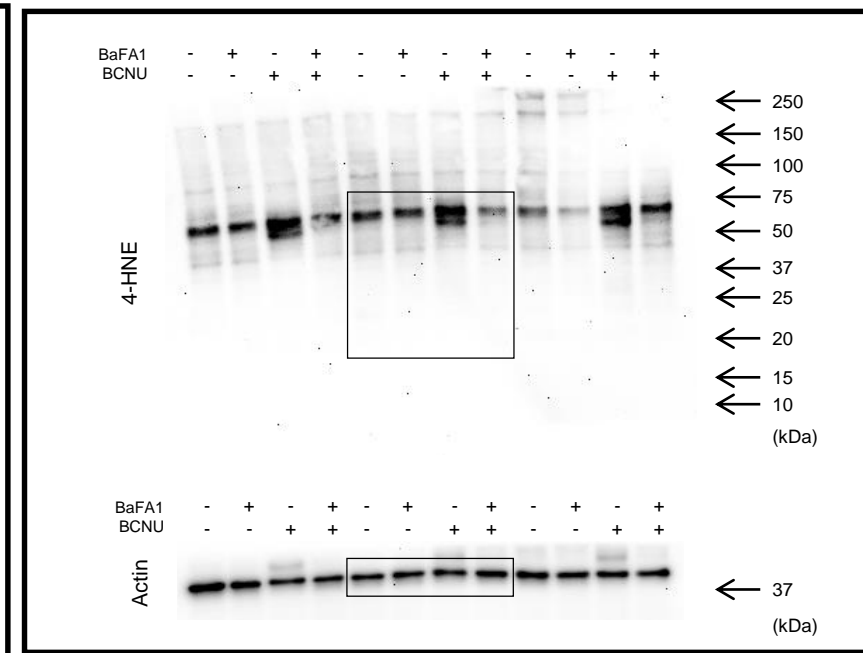



Figure 8C

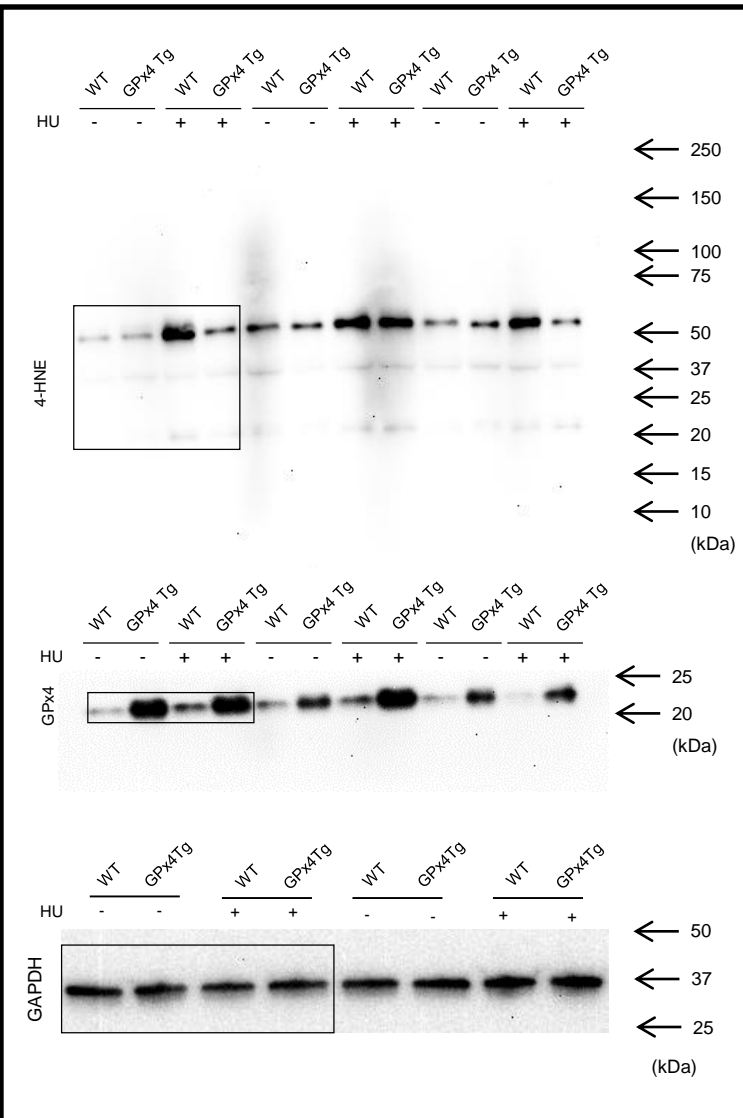

Figure 8F

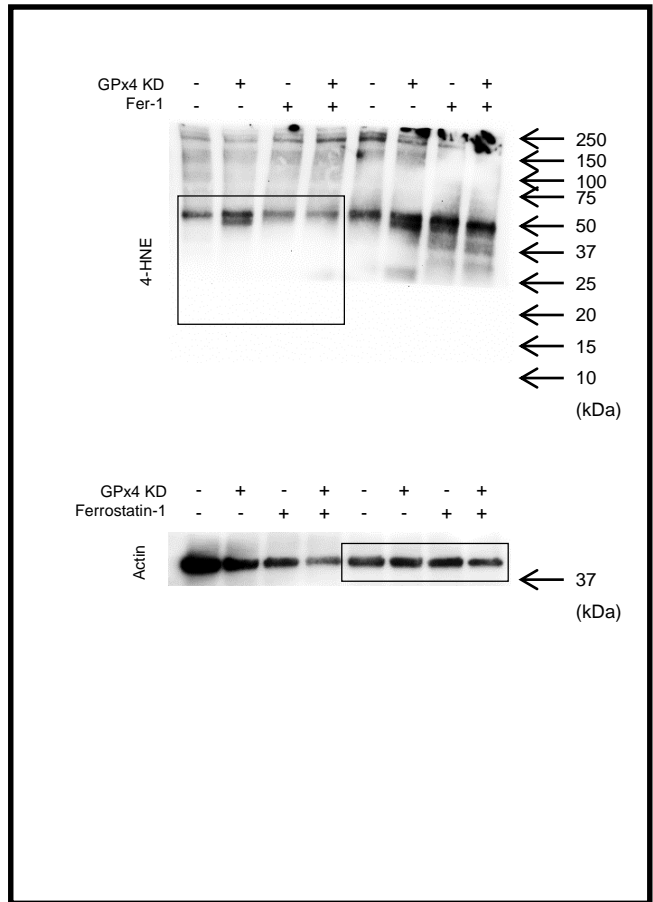

Figure 8-supplemental figure 2D

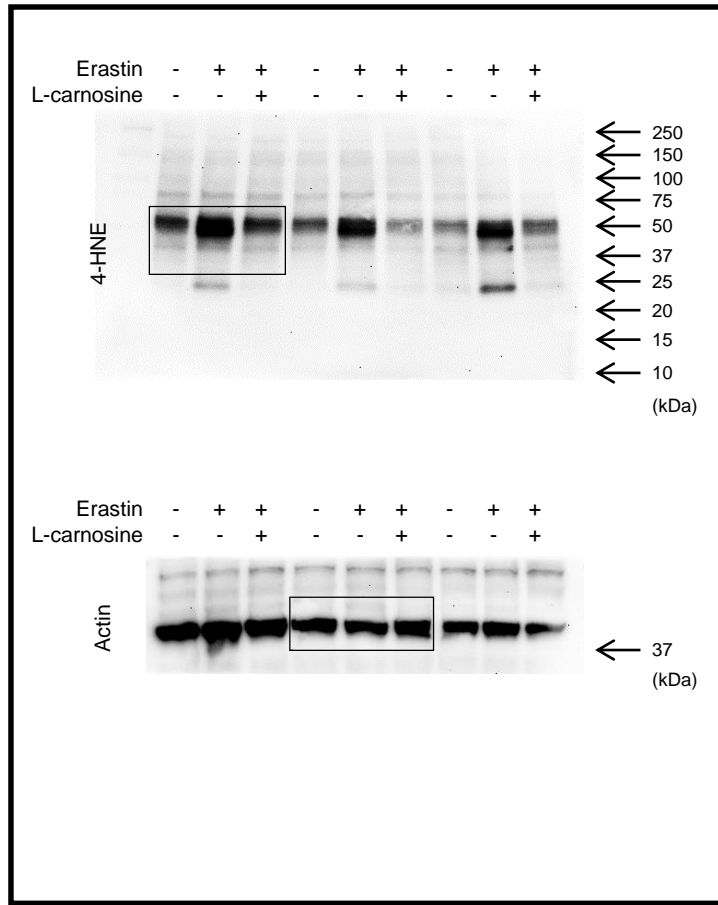

Figure 8-supplemental figure 2G

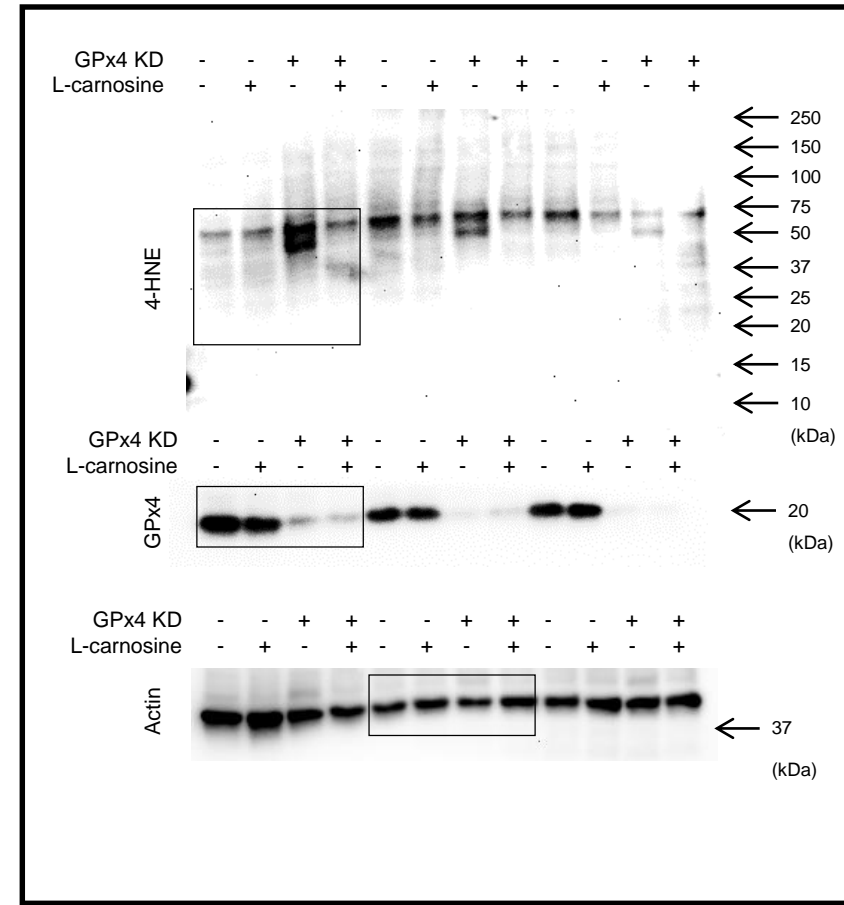

Figure 8-supplemental figure 3A

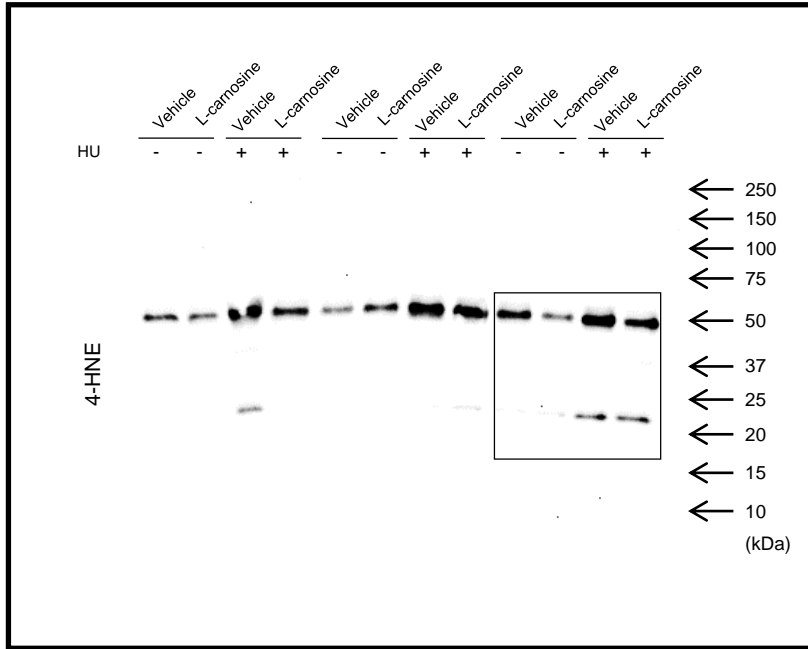

Figure 8-supplemental figure 3E

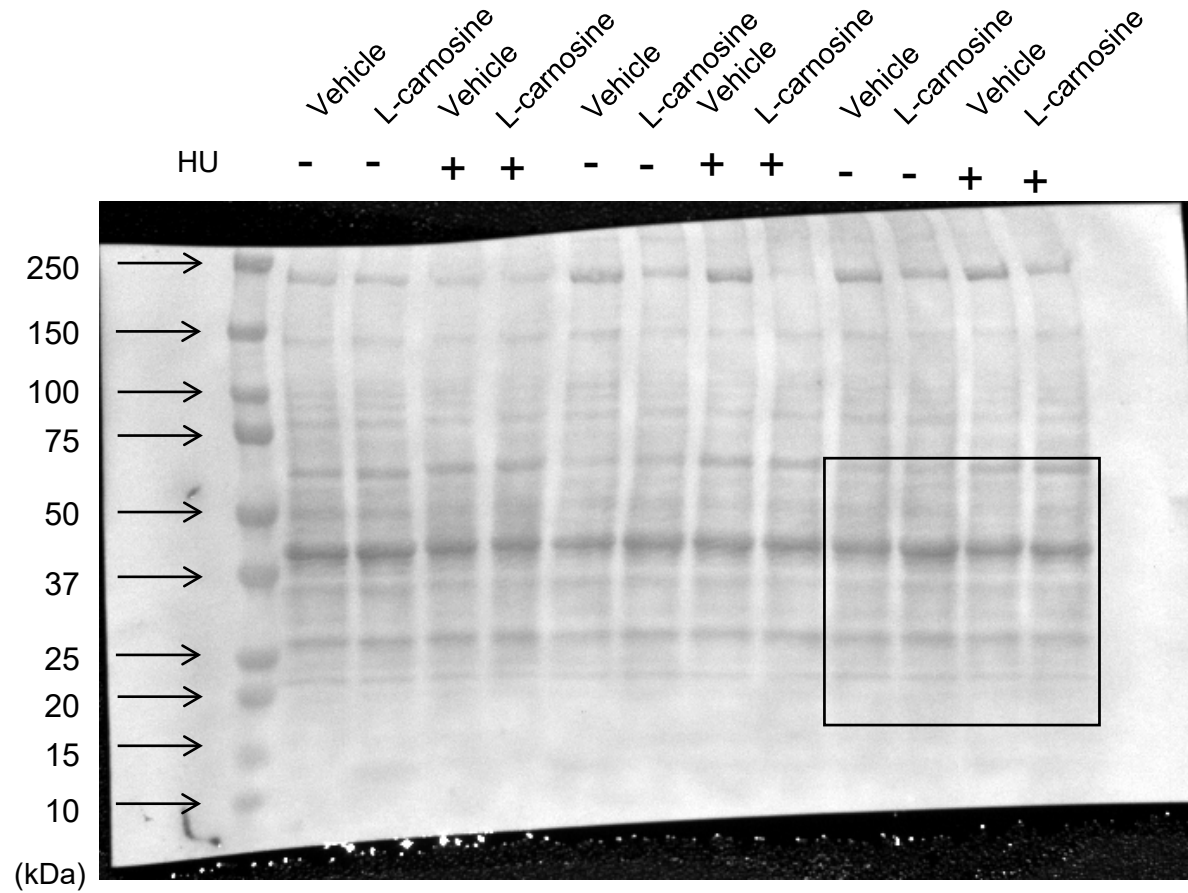

Figure 9B

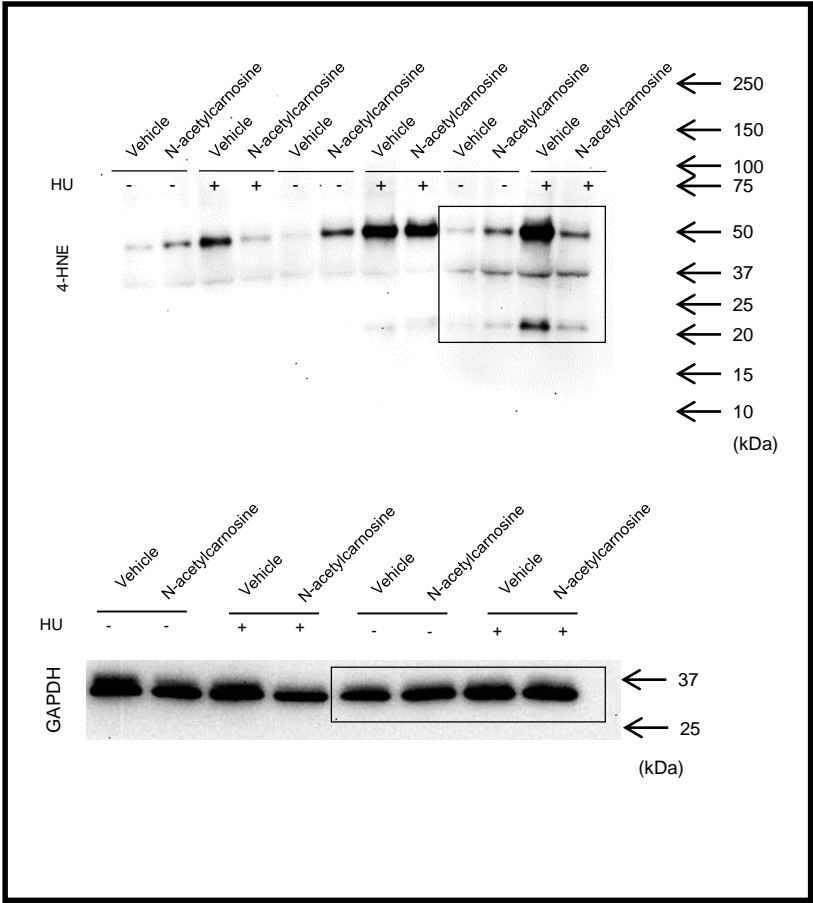

Figure 9-supplemental figure 1A

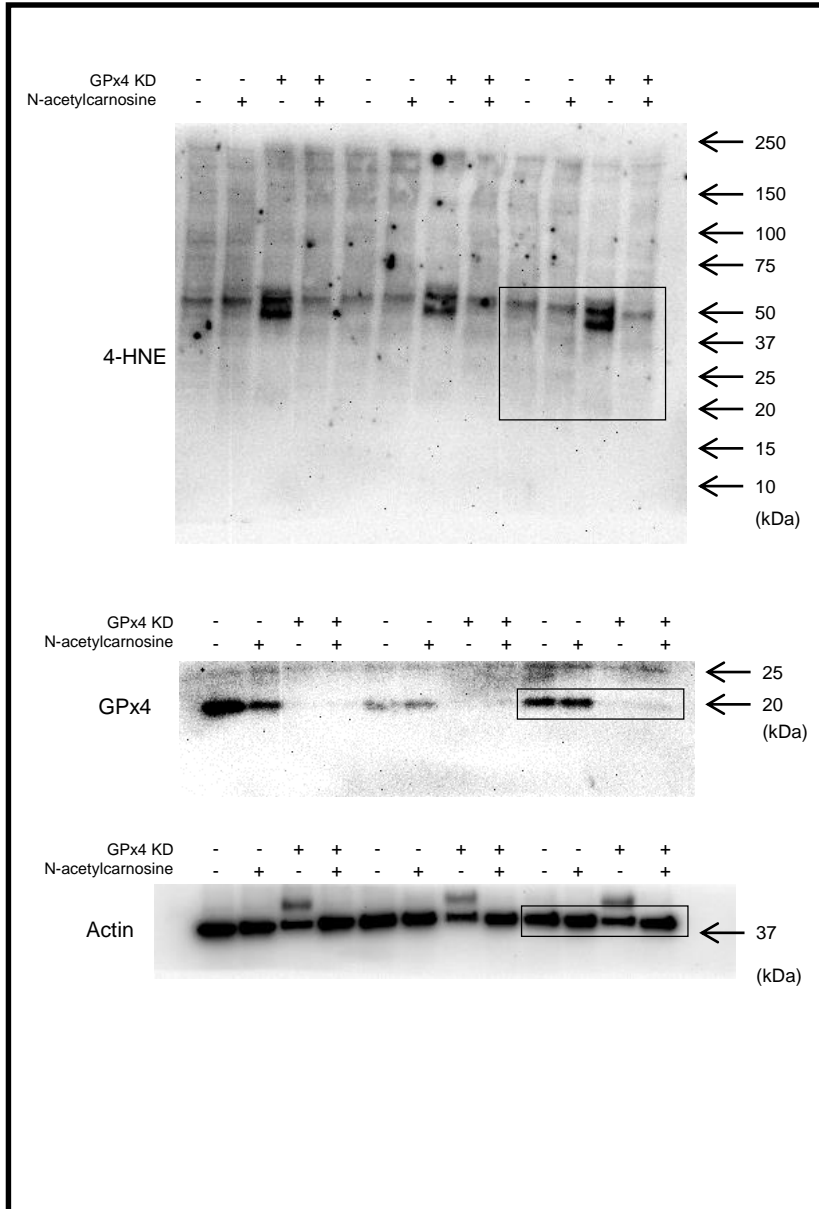

Figure 9-supplemental figure 1D

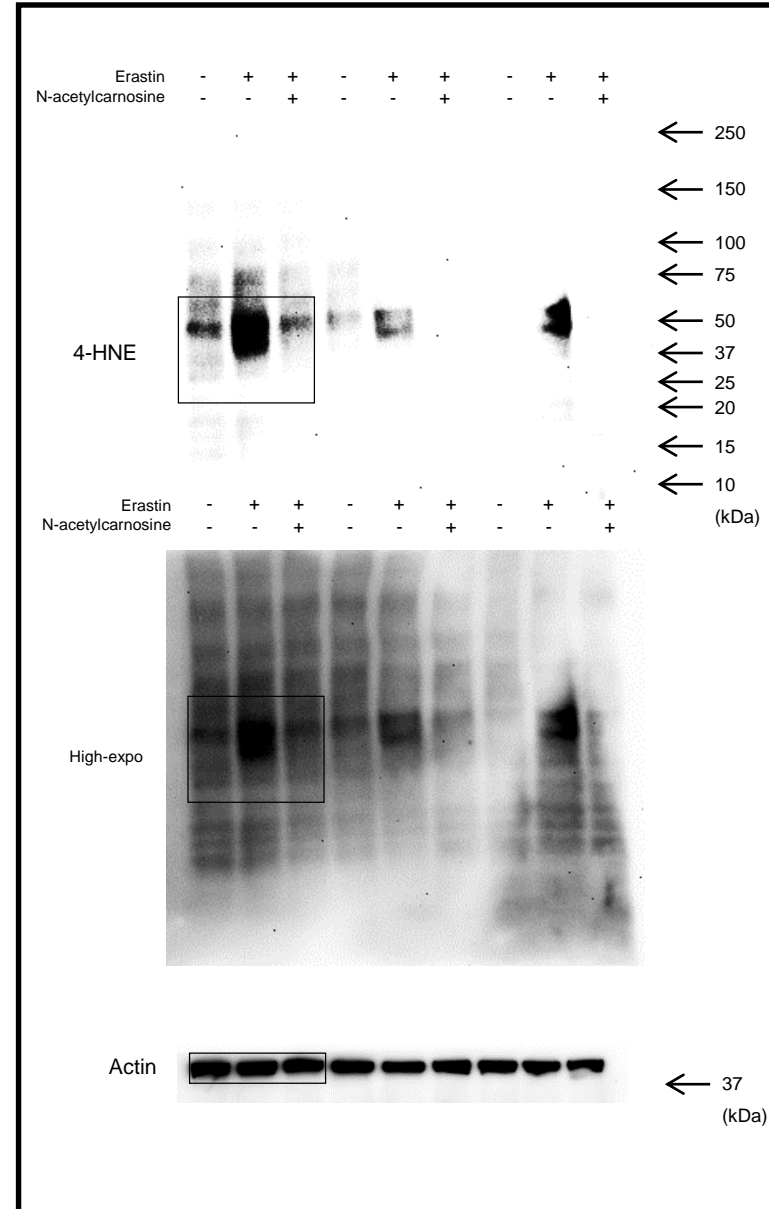

Figure 9-supplemental figure 2F

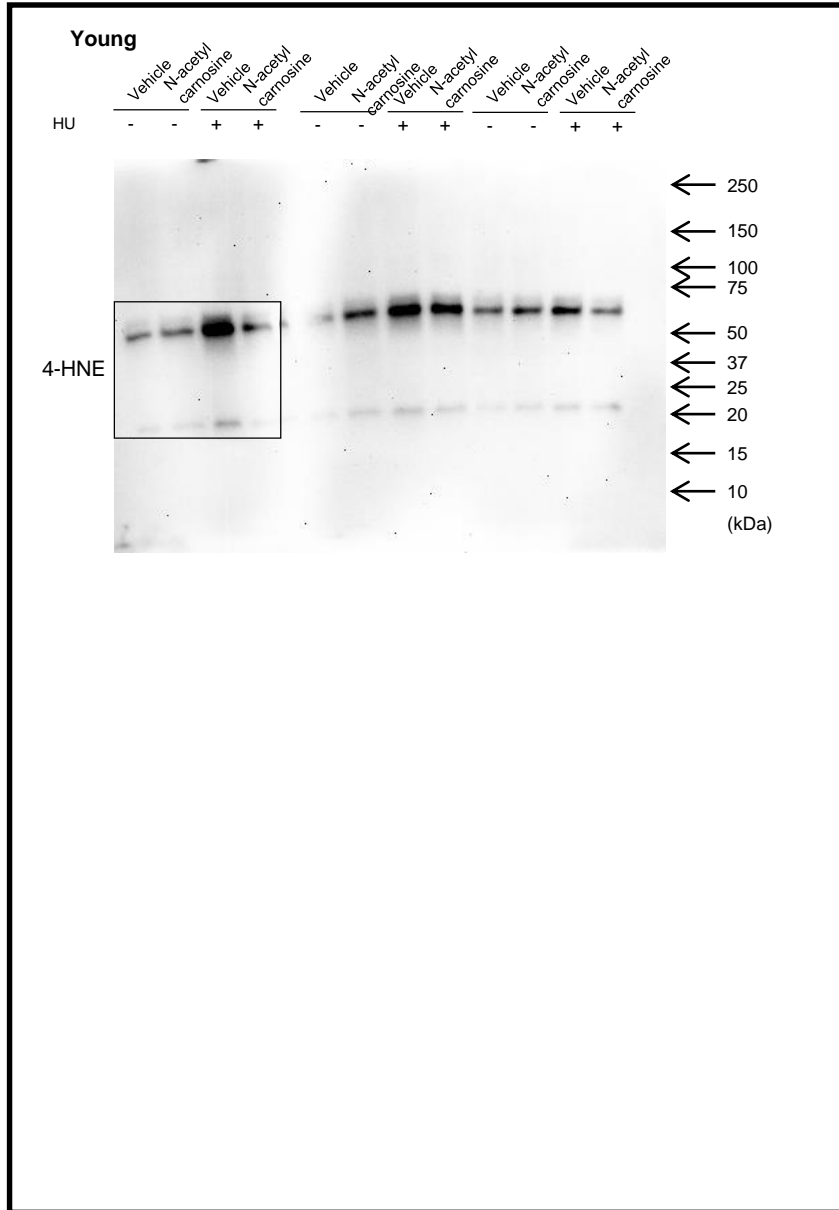

Figure 9-supplemental figure 2F

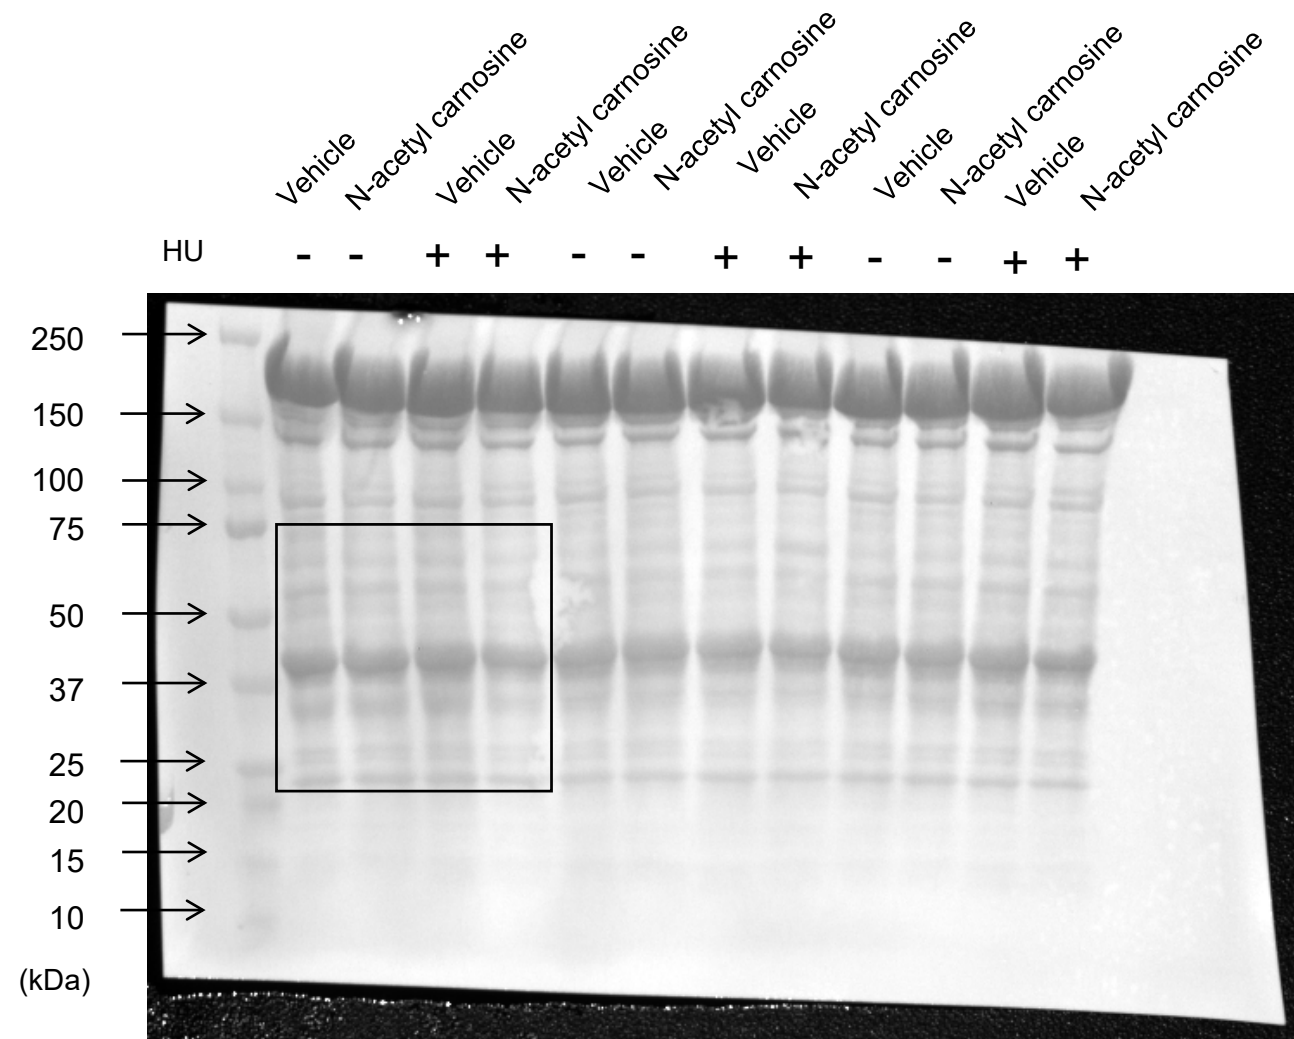

Supplement: supp [file elife-85289-supp-v1.zip]
